# Supplementary material for: Phytoplankton Diversity Effects on Community Biomass and Stability along Nutrient Gradients in a Eutrophic Lake
Source: Int J Environ Res Public Health. 2017 Jan 20;14(1):95. doi: 10.3390/ijerph14010095 (PMC5295345; doi:10.3390/ijerph14010095)
Supplement: Supplementary file 1 [file ijerph-14-00095-s001.xlsx]

## Sheet: Sheet1
Supplementary Materials: Phytoplankton Diversity Effects on Community Biomass and Stability along Nutrient Gradients in a Eutrophic Lake																																					S3
Wang Tian, Huayong Zhang, Lei Zhao, Feifan Zhang and Hai Huang
Table S1. The list of phytoplankton species in Lake Qixinghu. The symbol '+' means that the species appeared in the site.
		Scenario 1																	Scenario 2																		Scenario 3
	Latin name	Site 1	Site 2	Site 3	Site 4	Site 5	Site 6	Site 7	Site 8	Site 9	Site 10	Site 11	Site 12	Site 13	Site 14	Site 15	Site 16		Site 1	Site 2	Site 3	Site 4	Site 5	Site 6	Site 7	Site 8	Site 9	Site 10	Site 11	Site 12	Site 13	Site 14	Site 15	Site 16			Site 1	Site 2	Site 3	Site 4	Site 5	Site 6	Site 7	Site 8	Site 9	Site 10	Site 11	Site 12	Site 13
Cyanophyta	Oscillatoria princeps	+	+	+	+	+	+	+	+		+		+		+	+	+		+	+	+	+	+	+	+	+		+	+	+	+	+	+	+			+	+	+	+	+	+	+	+		+	+	+	+
	Oscillatoria limosa		+	+		+	+	+	+	+				+						+	+		+	+	+	+	+		+	+	+							+	+		+	+	+	+	+		+	+	+
	Oscillatoria formosa	+		+										+					+		+				+					+	+						+	+	+			+	+					+	+
	Oscillatoria tenuis		+	+	+	+	+	+	+	+	+	+	+		+	+	+			+	+	+	+	+	+	+	+	+	+	+	+	+	+	+				+	+	+	+	+	+	+	+	+	+	+	+
	Merismopedia sinica			+	+	+		+		+	+	+	+	+	+	+						+	+		+		+	+	+	+	+	+	+							+	+	+	+		+	+	+	+	+
	Raphidiopsis curvata			+	+												+				+	+												+					+	+
	Nostoc sphaeroides	+	+	+		+							+	+	+	+			+	+			+							+	+	+	+				+	+			+							+	+
	Phormidium tenus	+	+	+	+	+	+	+	+		+	+	+		+		+		+	+	+	+	+	+	+	+		+	+	+		+		+			+	+	+	+	+	+	+	+		+	+	+
	Lyngbya limnetiea	+		+		+											+		+				+											+			+				+
	Lyngbya major	+	+	+		+	+			+	+				+	+	+		+	+			+				+	+						+			+	+			+	+			+	+
	Microcystis marginata			+	+						+					+						+						+										+		+						+
	Microcystis incerta				+						+	+			+							+							+		+	+								+							+		+
	Chroococcus minutus							+			+				+	+
	Anabaena spiroides														+	+	+
	Dactylococcopsis sp.																									+																		+
Chlorophyta	Chlorella vulgaris	+	+	+	+	+	+	+	+		+	+	+	+	+	+	+		+	+	+	+	+	+	+	+		+	+	+	+	+	+	+			+	+	+	+	+	+	+	+		+	+	+	+
	Chlorella ellipsoidea	+	+	+	+	+	+	+	+	+	+	+	+		+		+		+	+	+	+	+	+	+	+	+	+	+	+		+		+			+	+	+	+	+	+	+	+	+	+	+	+
	Chlorella pyrenoidesa		+	+	+	+	+	+	+	+	+	+	+	+	+	+				+		+	+	+	+	+	+	+	+	+	+	+	+					+		+	+	+	+	+	+	+	+	+	+
	Ulothrix tenerrima	+		+	+	+	+	+		+	+		+	+		+	+		+		+	+	+	+	+	+	+	+		+	+		+	+			+		+	+	+	+	+	+	+	+		+	+
	Ulothrix moniliformis			+	+	+	+		+				+	+	+						+	+	+	+		+			+	+	+	+							+	+	+	+		+			+	+	+
	Uronema confervicolum		+	+	+	+	+	+	+		+	+	+	+		+	+			+	+		+	+	+	+		+	+	+	+		+	+				+	+		+	+	+	+		+	+	+	+
	Scenedesmus quadricanda			+	+	+	+	+	+	+	+	+			+	+	+				+	+	+	+	+	+	+	+	+			+	+	+					+	+	+	+	+	+	+	+	+
	Scenedesmus acuminatus	+	+	+	+				+	+	+	+	+	+					+	+						+	+	+	+	+	+						+	+						+	+	+	+	+	+
	Scenedesmus dimorphus		+	+	+	+	+	+		+	+		+		+	+	+					+	+		+		+	+		+		+	+	+						+	+	+	+		+	+		+
	Scenedesmus obliquus								+					+												+					+													+					+
	Tetraedron trigonum			+	+	+	+	+	+	+	+		+		+	+	+				+	+	+	+	+	+	+	+		+	+	+	+	+					+	+	+	+	+	+	+	+		+	+
	Tetraedron tumidulum			+	+	+		+	+		+		+			+						+	+		+	+		+		+	+		+							+	+		+	+		+		+	+
	Closterium gracile Breb.	+		+	+	+	+	+	+	+	+	+	+	+	+	+	+		+		+		+		+	+	+	+	+	+	+	+	+	+			+		+		+	+	+	+	+	+	+	+	+
	Closterium intermedium Ralfs		+											+			+			+											+			+				+											+
	Crucigenia quadrata											+		+															+		+																+		+
	Crucigenia tetrapedia															+
	Ankistrodesmus spiralis			+	+	+										+	+				+	+	+																	+	+
	Ankistrodesmus falcatus														+
	Oocystis solitaria		+	+	+	+	+	+			+		+		+	+	+			+	+	+	+	+	+			+		+		+		+				+	+	+	+	+	+			+		+
	Oocystis elliptica	+	+	+	+	+	+	+	+		+		+				+		+	+		+	+	+	+	+				+				+			+	+		+	+	+	+	+				+
	Franceia Lemmermann						+	+	+		+	+			+	+	+								+	+		+	+				+	+								+	+			+	+
	Gloeocystis sp.			+	+	+					+					+	+					+	+																	+	+
	Quadrigula chodatii	+													+				+													+					+
	Palmellococcus sp.													+
	Coelastrum microporum													+			+
	Cosmarium pachydermum Lund.	+		+		+		+											+		+		+		+												+		+		+		+
	Netrium digitus		+											+						+											+							+											+
	Staurastrum muticum Breb.		+		+			+		+			+	+		+	+					+			+		+			+	+		+	+						+			+		+			+	+
	Pediastrum duplex	+																	+
	Pediastrum tetras																								+
	Kirehneriella sp.																								+
Bacillariophyta	Cyclotella striata	+																	+																		+
	Cyclotella stelligera		+	+	+	+	+	+							+		+			+	+	+	+	+	+							+		+				+	+	+	+	+	+
	Cyclotella bodanica	+	+	+	+	+	+	+							+	+	+		+	+	+	+	+	+	+							+	+	+			+	+	+	+	+	+	+
	Cyclotella comensis	+			+		+	+								+	+		+			+		+	+								+	+			+					+	+
	Melosira granulata		+	+	+	+			+	+	+	+	+	+	+					+		+	+			+	+	+	+	+	+	+						+		+	+			+	+	+		+	+
	Melosira varians						+	+		+		+			+	+	+								+		+		+					+								+	+
	Nitzschia sublinearis										+																	+
	Synedra acusvar			+			+				+		+		+		+													+		+										+						+
	Synedra sp.						+	+			+				+		+							+	+			+						+								+	+			+
	Navicula simplex																									+			+															+
	Navicula rhynchocephala												+
	Navicula cuspidata	+	+			+													+	+			+														+	+			+
	Fragilaria capucina			+	+		+	+	+	+		+	+	+	+	+	+				+	+			+	+			+	+	+	+	+	+					+	+		+	+	+			+	+	+
	Fragilaria intermedia													+	+																+																		+
	Fragilaria sp.						+	+	+	+	+	+	+	+	+	+	+							+	+	+	+		+	+	+	+	+	+								+	+					+	+
	Cymbella microcephala	+																	+
	Cymbella pusilla				+
	Tabellaria fenestrata		+	+		+										+							+																		+
	Amphipleura pellucida												+			+														+			+															+
	Diatoma vulgare																												+																		+
	Gomphonema sp.									+
Euglenophyta	Euglena caudata							+					+				+								+					+													+					+
	Trachelomonas volvecina			+	+			+									+					+			+																		+
	Phacus pleuronectes	+	+						+					+					+	+						+					+						+	+											+
	Phacus helicoides Pochm												+
	Lepocinclis ovum	+	+	+	+						+		+	+		+			+	+	+							+		+	+						+	+	+									+	+
Xanthophyta	Tribonema viride							+		+				+			+								+						+												+						+
	Tribonema affine																													+																		+
Pyrrophyta	Ceratium hirundinella	+		+						+			+				+		+								+			+							+											+
	Peridinium cinctum												+																	+																		+
Cryptophyta	Chroomonas sp.				+
	Cryptomonas sp.																														+																		+
[truncated: 19 more columns]
